# Supplementary material for: REDOX Balance in Oligodendrocytes Is Important for Zebrafish Visual System Regeneration
Source: MDPI journal article supplement (doi:10.3390/antiox12122026), 2023-11-22
Supplement: s1 [file s1]

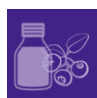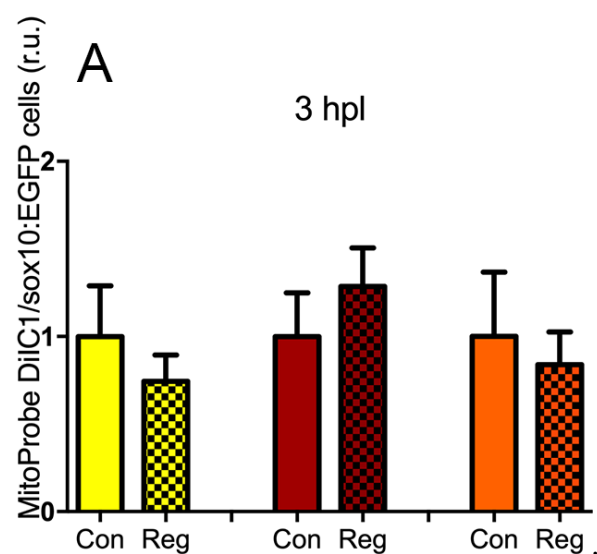

**Figure S1. Analysis of the mitochondrial membrane potential.** A) Membrane potential measured with MitoProbe DiIC1<sup>®</sup> by flow cytometry. Con: control; COT: contralateral optic tectum; hpl: hours post-lesion; IOT: ipsilateral optic tectum; ON: optic nerve; Reg: regeneration; r.u.: random units.
